# Supplementary material for: Co-metabolic formation of substituted phenylacetic acids by styrene-degrading bacteria
Source: PubMed Central journal article supplement — Biotechnol Rep (Amst). 2015 Jan 21;6:20–6. doi: 10.1016/j.btre.2015.01.003 (PMC5466254; doi:10.1016/j.btre.2015.01.003), 2015-01-21
Supplement: mmc1.pdf [file mmc1.pdf]

## **Supplemental material**

**Title: Co-metabolic formation of substituted phenylacetic acids by  
styrene-degrading bacteria**

Michel Oelschlägel, Stefan R. Kaschabek, Juliane Zimmerling, Michael Schlömann,  
and Dirk Tischler

*Interdisciplinary Ecological Center*, Environmental Microbiology Group, TU  
Bergakademie Freiberg, Leipziger Str. 29, 09599 Freiberg, Germany

Author for correspondence: Michel Oelschlägel

Tel.: +49-3731-394015

Fax.: +49-3731-393012

E-mail: [michel.oelschlaegel@ioez.tu-freiberg.de](mailto:michel.oelschlaegel@ioez.tu-freiberg.de)

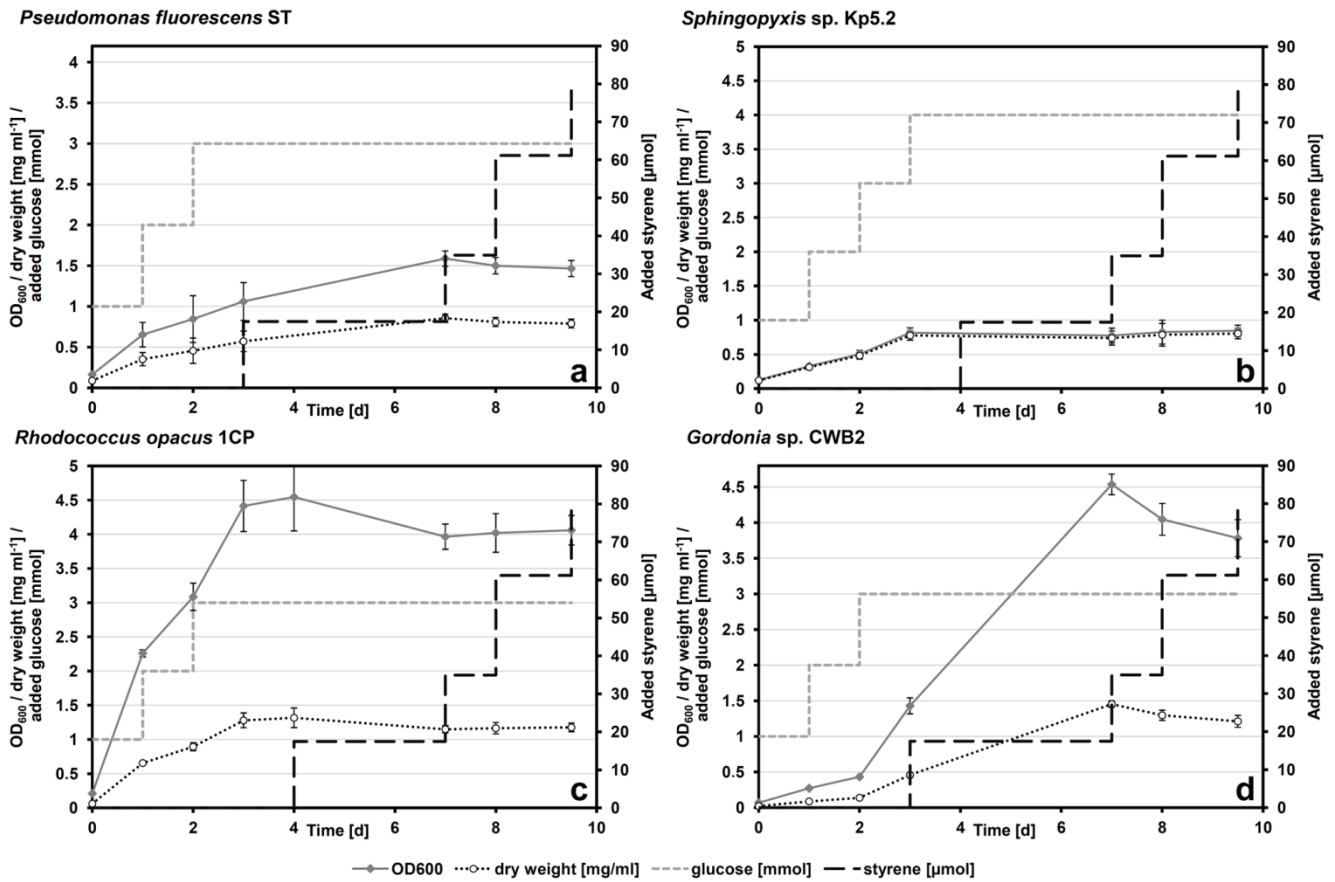

**Fig. S1.** Cultivation and induction of biomass for the transformation of styrenes. Biomass of strain ST, Kp5.2, 1CP, and CWB2 was cultured over 3-4 days with in total 3.0-4.0 mmol glucose. Subsequently, styrene was added in total amounts of 79 μmol over a period of 5.5-6.5 days. Obtained biomass was pooled and used for transformation experiments. Development of the OD<sub>600</sub>, the dry weight, and the added amounts of glucose and styrene are illustrated. Data points for OD<sub>600</sub> and dry weight represent the mean of two to four independent measurements and error bars are given.
